# Supplementary material for: In vitro DNA SCRaMbLE
Source: PubMed Central journal article supplement (PMC5964173; doi:10.1038/s41467-018-03743-6), 2018-05-22
Supplement: 41467_2018_3743_MOESM1_ESM.pdf [file 41467_2018_3743_MOESM1_ESM.pdf]

*In vitro* DNA SCRaMbLE

Wu et al.

Supplementary Materials for  
*In vitro* DNA SCRaMBLE

Yi Wu, Rui-Ying Zhu, Leslie A. Mitchell, Lu Ma, Rui Liu, Meng Zhao, Bin Jia, Hui Xu, Yun-Xiang Li, Zu-Ming Yang, Yuan Ma, Xia Li, Hong Liu, Duo Liu, Wen-Hai Xiao, Xiao Zhou, Bing-Zhi Li, Ying-Jin Yuan, Jef D. Boeke\*

Correspondence to: [Jef.Boeke@nyumc.org](mailto:Jef.Boeke@nyumc.org)

**This PDF file includes:**

Supplementary Figure 1 to 16  
Supplementary Tables 1 to 2

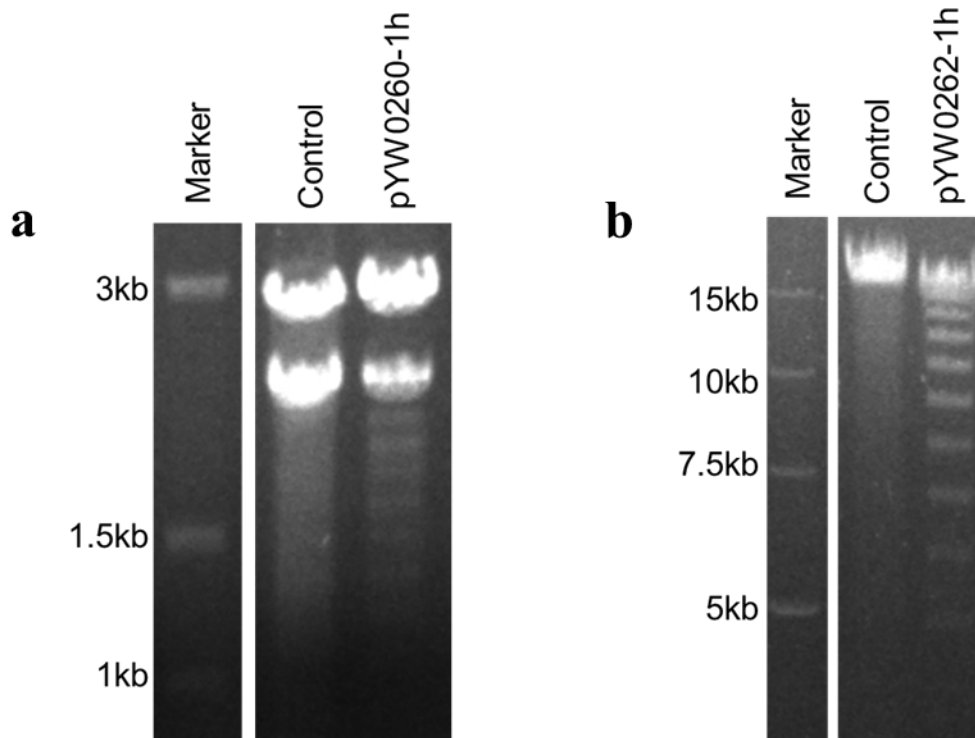

**Supplementary Figure 1. *In vitro* SCRaMbLEing DNA constructs encoding 10 loxPsym sites.** (a) The substrate DNA is a plasmid (pYW0260) encoding 10 loxPsym sites with 100bp between adjacent loxPsym sites. The DNA for digestion was extracted from a pool of transformed *E.coli* colonies and then linearized by *Bam*HI and *Bg*III. (b) The substrate DNA is a plasmid (pYW0262) encoding 10 loxPsym sites with 1000bp between adjacent loxPsym sites. The DNA for digestion was extracted from population of transformed *E.coli* colonies and then linearized by *Sca*I. Marker, Trans 15k DNA Marker.

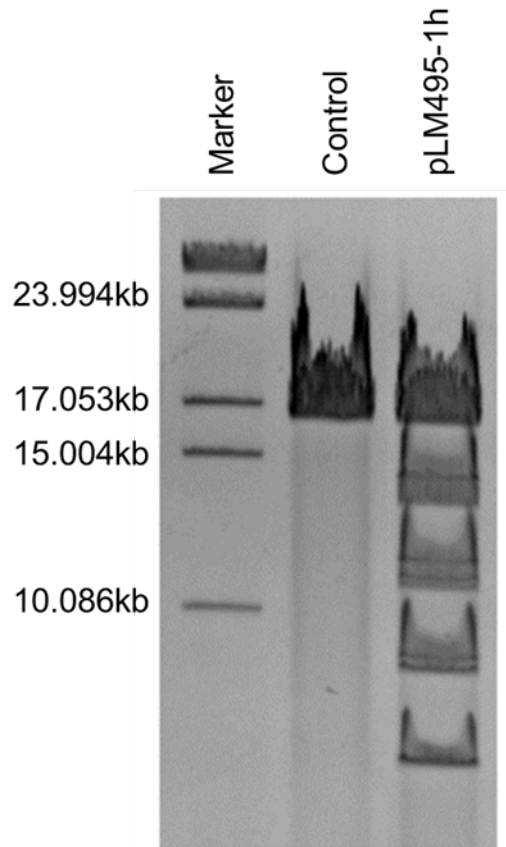

**Supplementary Figure 2. Pulsed-field gel analysis of top-down *in vitro* SCRaMbLED pLM495.** The DNA libraries was extracted from pool of SCRaMbLED *E.coli* colonies and then linearized by *NotI*. Marker, Lambda DNA-Mono Cut Mix. The *NotI* site is encoded on the vector backbone of pLM495. pLM495 is 16.1kb in length with inter-loxPsym distances of 2.0, 2.6, 2.8, and 2.3 kb.

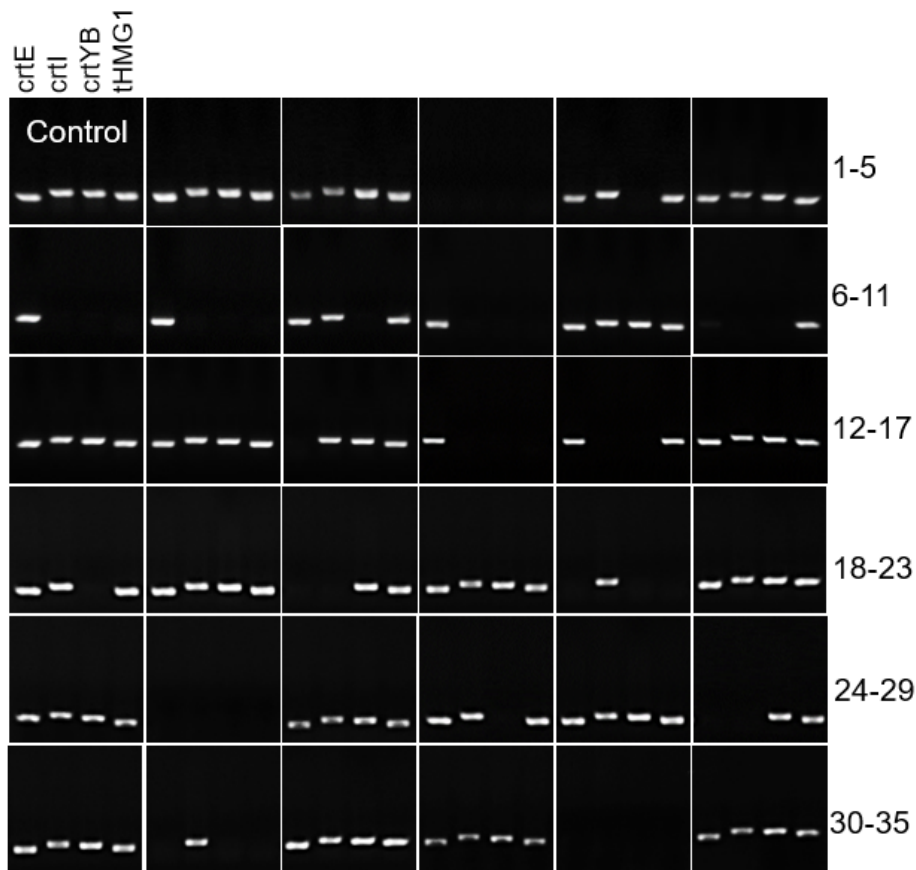

**Supplementary Figure 3. PCR analysis of top-down *in vitro* SCRaMbLED pLM495 to evaluate gene deletions.** A total of 300 pLM495 *E.coli* strains (35 shown here) were randomly picked from *in vitro* SCRaMbLED *E.coli* transformants. The control panel used purified pLM495 as template DNA.

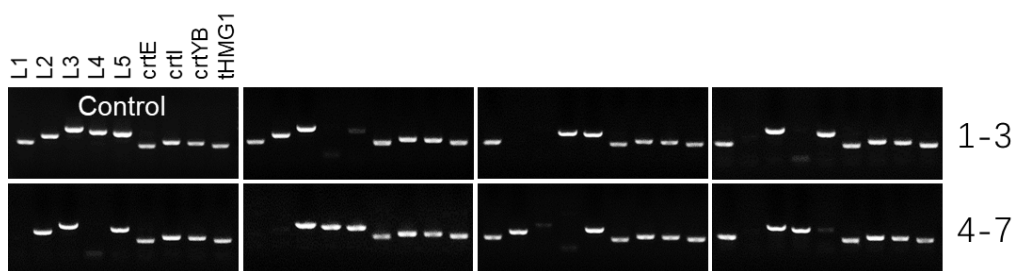

**Supplementary Figure 4. PCR analysis of top-down *in vitro* SCRaMbLED pLM495 to evaluate inversion frequency.** A total of 100 pLM495 *E.coli* strains (7 shown here) were randomly picked from *E.coli* colonies transformed with *in vitro* SCRaMbLED pLM495. L1, L2, L3, L4, L5 are specific PCR reactions designed to amplify the junction regions of vector-*crtE*, *crtE-crtI*, *crtI-crtYB*, *crtYB-tHMG1*, *tHMG1*-vector respectively. PCR primers for genes *crtE*, *crtI*, *crtYB*, *tHMG1* are same as supplementary figure 3.

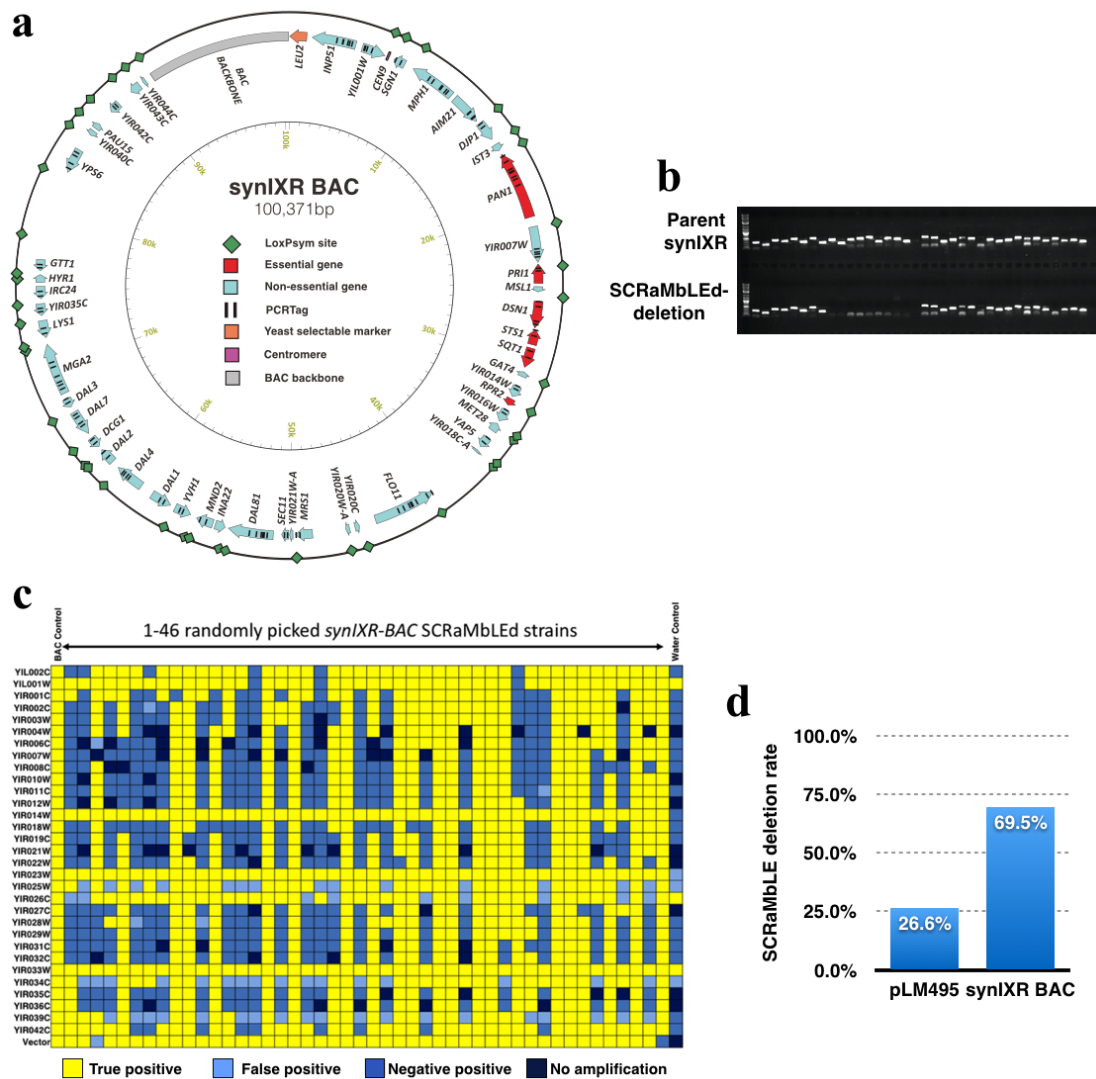

**Supplementary Figure 5. Deletion frequency for top-down *in vitro* SCRaMbLED *synIXR-BAC*.** (a) Map of *synIXR-BAC*. A total of 43 loxP sites are encoded, along with 46 genes from chromosome IX. (b) PCRTag analysis to evaluate deletion events following *in vitro* SCRaMbLE. PCRTags are designed in open reading frame to distinguish synthetic sequence from wild type sequence. (c) A total of 46 *E.coli* strains were randomly picked following *in vitro* SCRaMbLE and transformation and subjected to qPCRTag analysis. A heatmap predicts amplification as a function of crossing point (Cp) in each of 1536 wells. Yellow, crossing point (Cp) value <23, defined as true positives; Light blue, 23 < Cp Value < 26, defined as false positive PCR products; Blue, CP value >26, defined as negative PCR products; Dark blue, no amplification. The positive values in the water control are likely primer dimers. PCRTags in the top (near YIL002C) and bottom (near YIR042C) are close to the vector sequence, which encodes the gene used to select *E. coli* transformants (beta lactamase) and are least frequently deleted. (d) Deletion frequency for *in vitro* SCRaMbLE of plasmids with 5 or 43 loxP sites. PCR analysis was used to count the number of deletion events after

transformation of the *in vitro* SCRaMbLED pLM495 and *synIXR-BAC* to *E.coli* (Supplementary Figure 3, 4c).

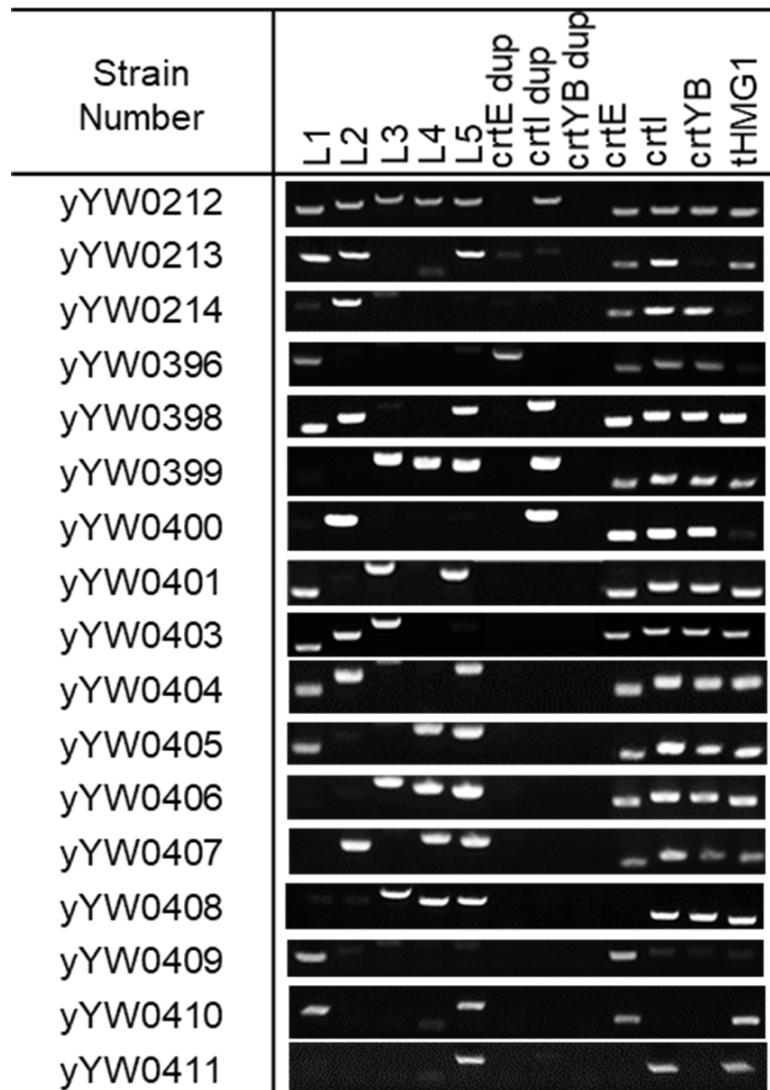

**Supplementary Figure 6. PCR analysis of top-down *in vitro* SCRaMbLED yeast strains.** A total of 17 SCRaMbLED pathways were analyzed by PCR with primers to test for deletion, inversion and duplication events. The template DNA for these reactions came from yeast recoveries as listed in Figure 2. L1, L2, L3, L4, L5 are PCR reactions designed to amplify the junction regions of vector-*crtE*, *crtE-crtI*, *crtI-crtYB*, *crtYB-tHMG1*, *tHMG1-vector*. *CrtE* dup, *crtI* dup, *crtYB* dup are PCR reactions designed to amplify the junction regions of duplications *crtE-crtE*, *crtI-crtI*, *crtYB-crtYB*. *CrtE*, *crtI*, *crtYB*, *tHMG1* are PCR reactions designed to amplify individual genes *crtE*, *crtI*, *crtYB*, *tHMG1*.

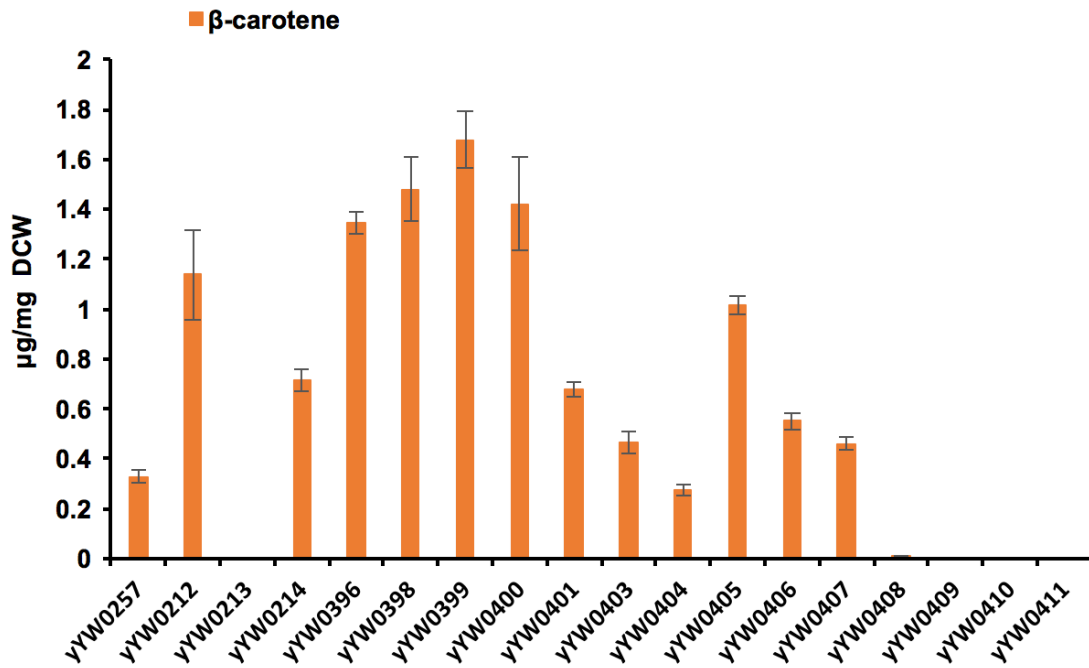

**Supplementary Figure 7. HPLC measurement of  $\beta$ -carotene production for *in vitro* SCRaMbLEd strains.** A total of 17 top-down SCRaMbLEd strains (as listed in figure 2) were tested for  $\beta$ -carotene production. Strain yYW0257 was a control sample with nonSCRaMbLEd pLM495. Quantification was performed in biological triplicate for each strain as shown. Error bars represent standard deviation from three replicates.



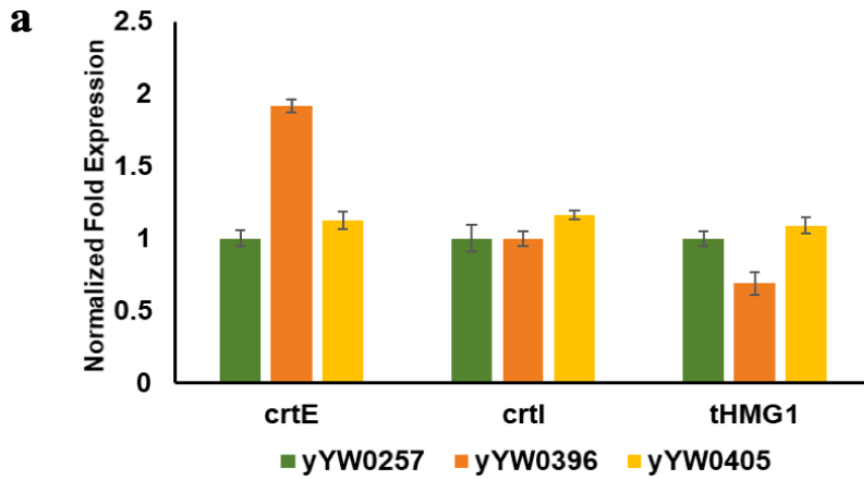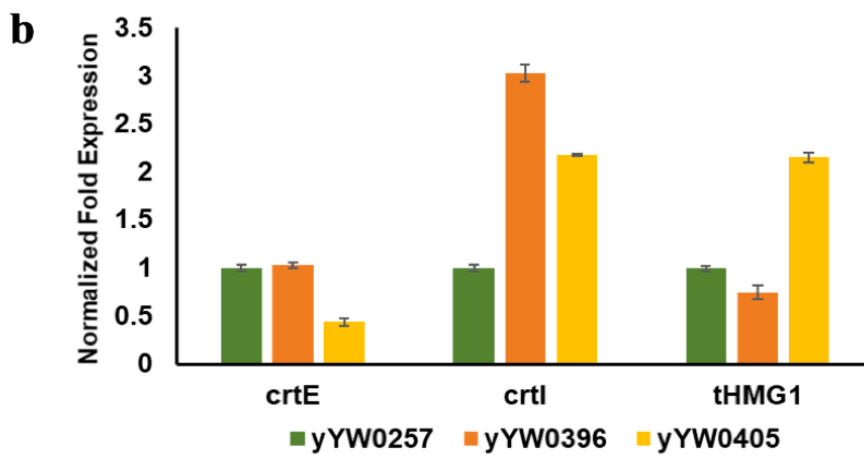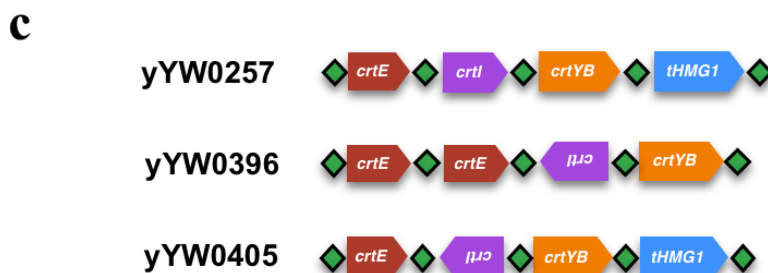

**Supplementary Figure 8. qPCR analysis the inversion of *crtI* gene in the SCRaMbLEd pathway.** (a) qPCR analysis of individual genes to assess copy number in the SCRaMbLEd construct. Purified yeast genomic DNA from strains carrying the SCRaMbLEd construct was used as template. (b) qPCR analysis to evaluate mRNA level for individual genes. Reverse transcribed cDNA from purified mRNA was used as templates. *CrtYB* was used as a reference gene. (c) Expected pathway structures of strains yYW0257, yYW0396, yYW0405.

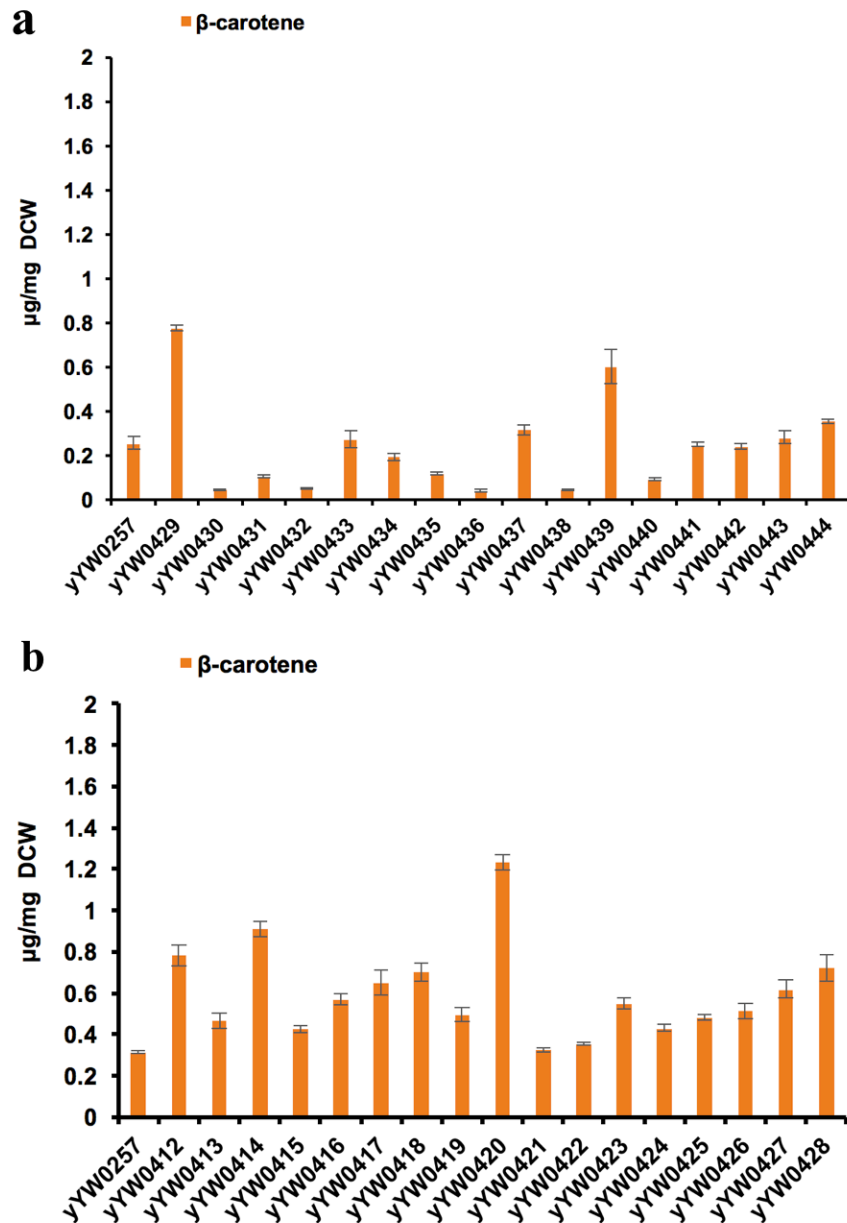

**Supplementary Figure 9. HPLC measurement of  $\beta$ -carotene production for randomized mutation and ARTP treated strains.** (a) HPLC measurement of  $\beta$ -carotene production of randomized mutation strains. A randomized mutation library of *crtI* gene in pLM495 was generated with a mutant rate at 5~10bp/Kb. The randomized library was transformed to *S. cerevisiae* cell for phenotypic testing. A total of 16 colonies with enhanced yellow color were screened from 1611 colonies on the plate and then subjected to measure production of  $\beta$ -carotene. (b) HPLC measurement of  $\beta$ -carotene production of atmospheric and room temperature plasma (ARTP) treated strains. A total of 17 colonies with enhanced yellow color were screened from 2353 colonies following exposure of the yeast strain yYW0257 to ARTP jet for 10 and 20 s. Strain yYW0257 was a control sample with pLM495.

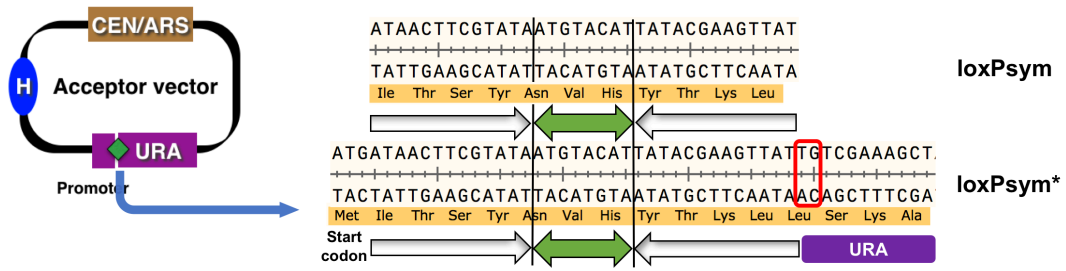

**Supplementary Figure 10. Bottom-up of *in vitro* SCRaMbLE with redesigned loxPsym site.** Structure and sequence comparison between loxPsym\* and loxPsym. The redesigned loxPsym site (loxPsym\*) is 36 bp and the insertion after start codon have no impact on the expression of *URA3*.

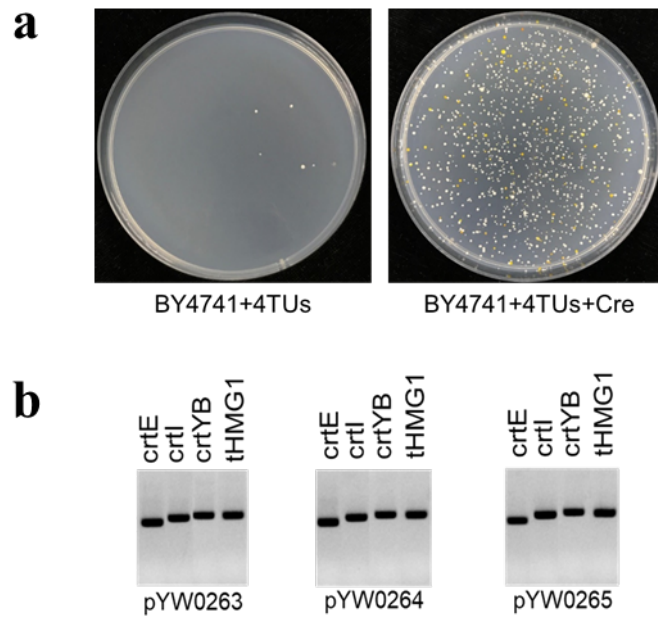

**Supplementary Figure 11. Using bottom-up *in vitro* SCRaMbLE to assemble the entire  $\beta$ -carotene pathway from exogenous TUs.** (a) BY4741, a wild-type yeast strain not carrying an integrated copy of the  $\beta$ -carotene pathway, was transformed with bottom-up *in vitro* SCRaMbLED carotenogenic TU pools using strategy of the first version (left panel, Figure. 3a). Yellow colored colonies were observed on the plate. (b) PCR analysis of colored yeast colonies. The template DNA used are plasmids recovered from three colored yeast colonies. Approximately 4 percent of yeast colonies are yellow in color, suggesting bottom-up *in vitro* SCRaMbLE assembly of all four components of the  $\beta$ -carotene pathway.

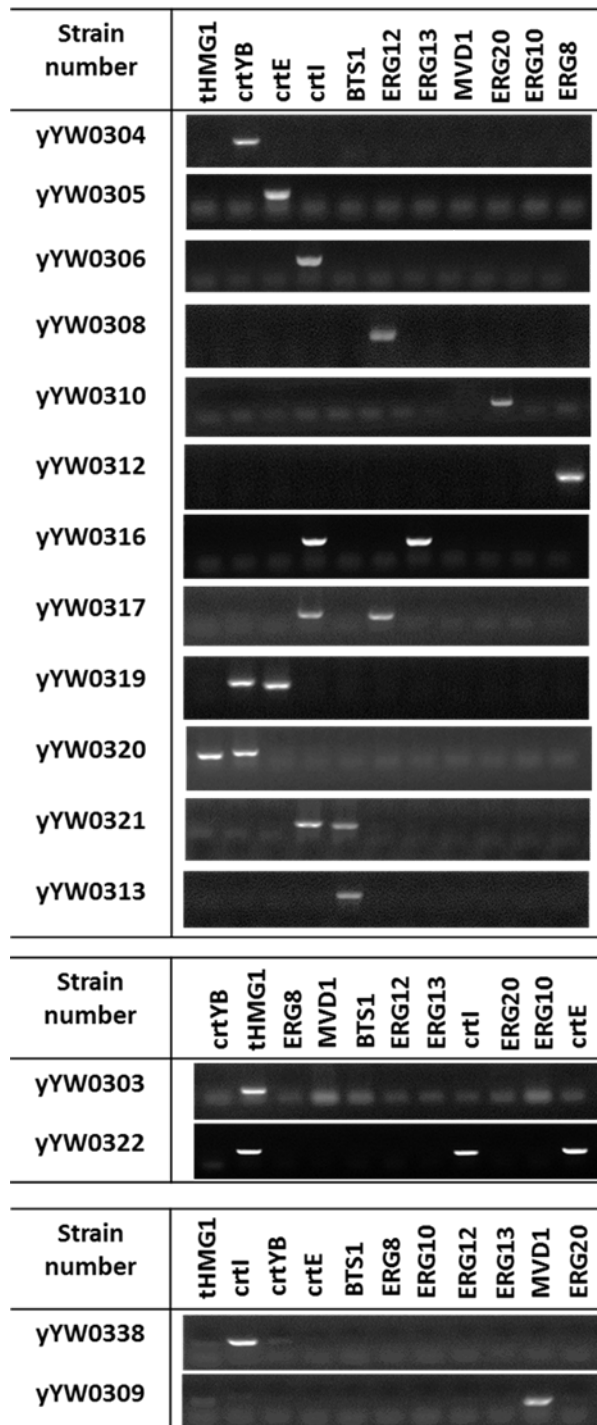

**Supplementary Figure 12. PCR analysis of bottom-up SCRaMbLED constructs in yeast.** All of the bottom-up SCRaMbLED plasmids in yeast strains listed in figure 4 were recovered to *E.coli* for PCR analysis with the primer pairs specific for the indicated genes.

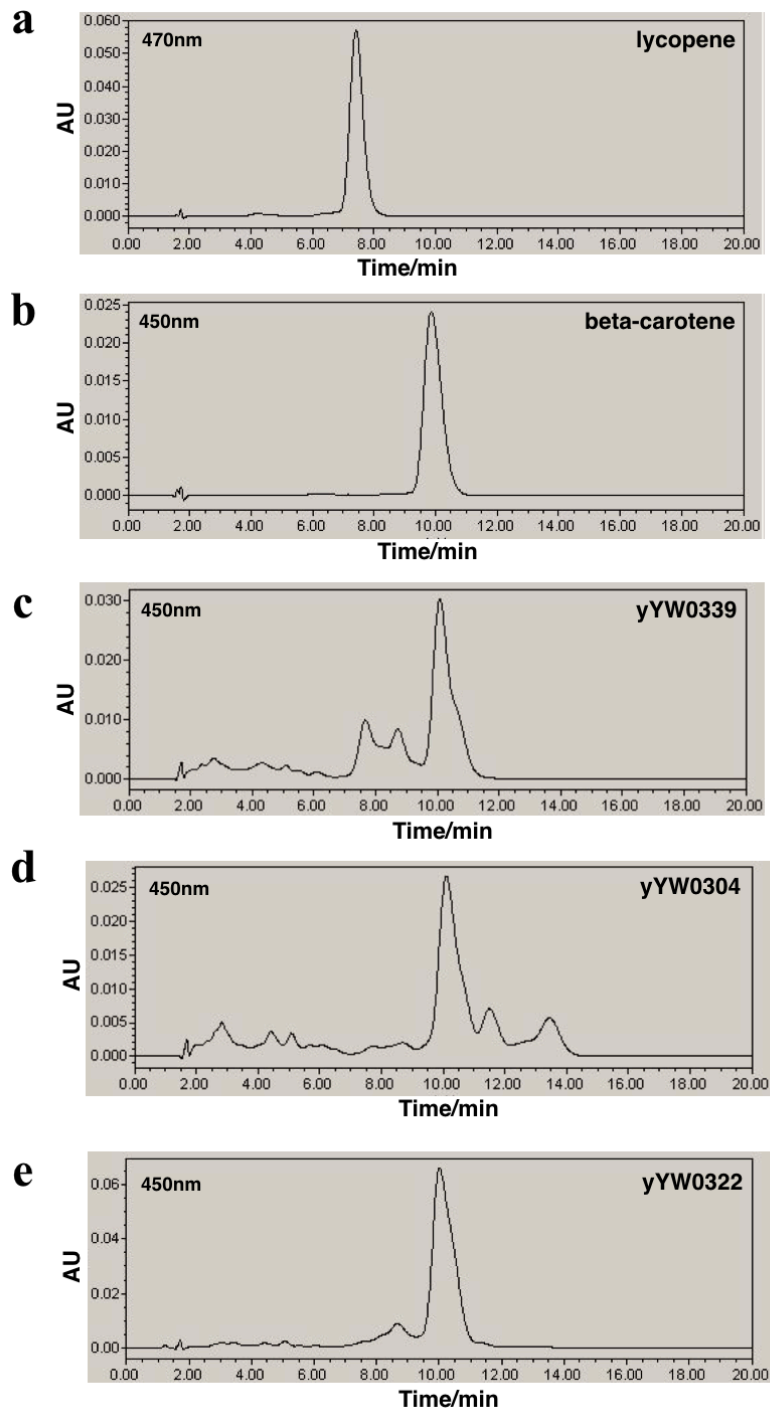

**Supplementary Figure 13. HPLC profiles for bottom-up SCRaMbLEd yeast strains.** (a,b) HPLC profile of standards, purified lycopene and beta-carotene; (c) HPLC curve of strain yYW0339. yYW0339 is the initial strain with non-SCRaMbLEable pathway integrated at *CAN1*; (d) HPLC curve of strain yYW0304. yYW0304 carries a SCRaMbLEd construct with an additional *crtYB* gene inserted. Two unknown peaks appear after the of  $\beta$ -carotene peak. (e) HPLC curve of strain yYW0322. yYW0322 carries a SCRaMbLEd construct with additional copies of three genes *crtI*, *crtE* and *tHMG1* and produces increased levels of  $\beta$ -carotene with minimal non-specific peaks. AU, absorbance unit.

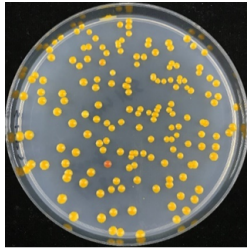

yYW0322

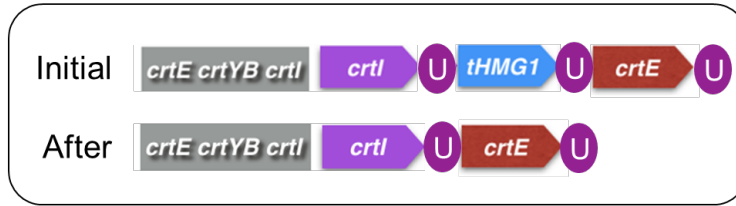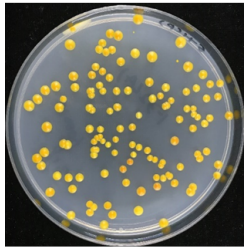

yYW0320

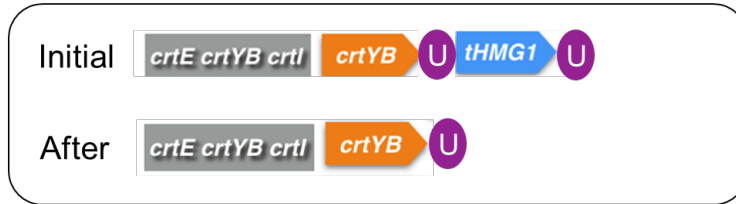

**Supplementary Figure 14. Stability of bottom-up *in vitro* SCRaMbLED constructs carrying two and three selection markers.** After continuous passage for 100 generations with SCRaMbLED strains yYW0322 and yYW0320, the recombination ratio is 1/159 for strain yYW0322 and 5/120 for strain yYW0320. The recombination events occurred between two *URA3* genes based on sequence analysis.

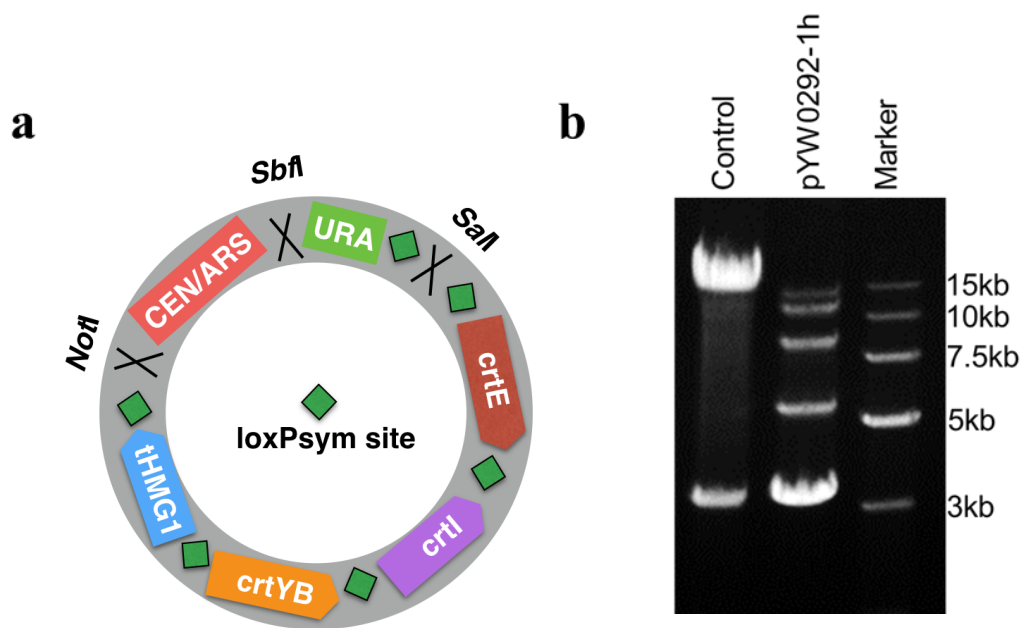

**Supplementary Figure 15. Increased efficiency of *in vitro* SCRaMbLE using a redesigned pLM495 (pYW0292).** (a) Map of the redesigned pLM495. A restriction enzyme cutting site (*SalI*) was inserted between two *loxPsym* sites. In this way, completely unSCRaMbLED constructs can be linearized by *SalI* and cannot successfully transformation. (b) Agarose gel analysis of *in vitro* SCRaMbLE with pYW0292. The increased rate of truncated bands indicates increased efficiency of *in vitro* SCRaMbLE using this plasmid rather than the parental plasmid. Before transformed to *E.coli*, the SCRaMbLED pool was digested by *SalI*. Both control and SCRaMbLED plasmids were digested by *NotI* and *SbfI* before gel analysis.



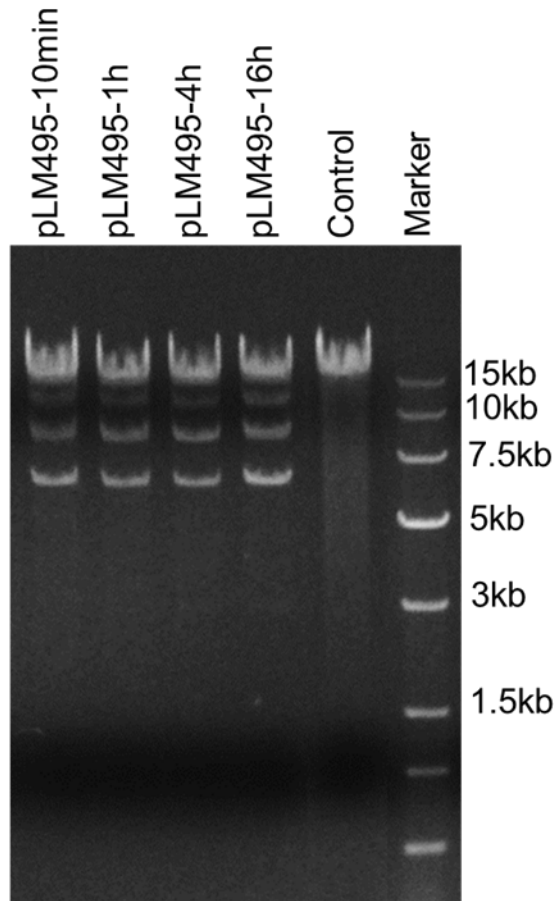

**Supplementary Figure 16. Agarose gel analysis of *in vitro* SCRaMbLEd pLM495 time course.** The *in vitro* SCRaMbLE reaction sampled at the indicated times. The SCRaMbLEd libraries were extracted from pool of SCRaMbLEd *E.coli* colonies and then linearized by *NotI*. Marker, Trans 15k DNA Marker.

**Supplementary Table 1. Yeast strains used in this study.**

| Strain name | Description                                                                                                                                         | Genotype                                 |
|-------------|-----------------------------------------------------------------------------------------------------------------------------------------------------|------------------------------------------|
| BY4741      |                                                                                                                                                     | <i>MATa his3Δ1 leu2Δ0 met15Δ0 ura3Δ0</i> |
| yYW0257     | Top-down <i>in vitro</i> SCRaMbLE control strain with unSCRaMbLEd pLM495                                                                            | <i>MATa his3Δ1 leu2Δ0 met15Δ0 ura3Δ0</i> |
| yYW0212     | Top-down <i>in vitro</i> SCRaMbLEd pLM495 yeast strain ( <i>crtI</i> duplication)                                                                   | <i>MATa his3Δ1 leu2Δ0 met15Δ0 ura3Δ0</i> |
| yYW0213     | Top-down <i>in vitro</i> SCRaMbLEd pLM495 yeast strain ( <i>crtYB</i> deletion)                                                                     | <i>MATa his3Δ1 leu2Δ0 met15Δ0 ura3Δ0</i> |
| yYW0214     | Top-down <i>in vitro</i> SCRaMbLEd pLM495 yeast strain ( <i>crtI</i> inversion, <i>crtE</i> inversion, <i>tHMG1</i> deletion)                       | <i>MATa his3Δ1 leu2Δ0 met15Δ0 ura3Δ0</i> |
| yYW0396     | Top-down <i>in vitro</i> SCRaMbLEd pLM495 yeast strain ( <i>crtE</i> duplication, <i>crtI</i> inversion, <i>tHMG1</i> deletion)                     | <i>MATa his3Δ1 leu2Δ0 met15Δ0 ura3Δ0</i> |
| yYW0398     | Top-down <i>in vitro</i> SCRaMbLEd pLM495 yeast strain ( <i>crtI</i> duplication, <i>crtYB</i> inversion)                                           | <i>MATa his3Δ1 leu2Δ0 met15Δ0 ura3Δ0</i> |
| yYW0399     | Top-down <i>in vitro</i> SCRaMbLEd pLM495 yeast strain ( <i>crtE</i> inversion, <i>crtI</i> duplication)                                            | <i>MATa his3Δ1 leu2Δ0 met15Δ0 ura3Δ0</i> |
| yYW0400     | Top-down <i>in vitro</i> SCRaMbLEd pLM495 yeast strain ( <i>crtI</i> duplication, two <i>crtI</i> and <i>crtE</i> inversion, <i>tHMG1</i> deletion) | <i>MATa his3Δ1 leu2Δ0 met15Δ0 ura3Δ0</i> |
| yYW0401     | Top-down <i>in vitro</i> SCRaMbLEd pLM495 yeast strain ( <i>crtI</i> and <i>crtYB</i> inversion)                                                    | <i>MATa his3Δ1 leu2Δ0 met15Δ0 ura3Δ0</i> |
| yYW0403     | Top-down <i>in vitro</i> SCRaMbLEd pLM495 yeast strain ( <i>tHMG1</i> inversion)                                                                    | <i>MATa his3Δ1 leu2Δ0 met15Δ0 ura3Δ0</i> |
| yYW0404     | Top-down <i>in vitro</i> SCRaMbLEd pLM495 yeast strain ( <i>crtYB</i> inversion)                                                                    | <i>MATa his3Δ1 leu2Δ0 met15Δ0 ura3Δ0</i> |
| yYW0405     | Top-down <i>in vitro</i> SCRaMbLEd pLM495 yeast strain ( <i>crtI</i> inversion)                                                                     | <i>MATa his3Δ1 leu2Δ0 met15Δ0 ura3Δ0</i> |
| yYW0406     | Top-down <i>in vitro</i> SCRaMbLEd pLM495 yeast strain ( <i>crtE</i> inversion)                                                                     | <i>MATa his3Δ1 leu2Δ0 met15Δ0 ura3Δ0</i> |
| yYW0407     | Top-down <i>in vitro</i> SCRaMbLEd pLM495 yeast strain ( <i>crtE</i> and <i>crtI</i> inversion)                                                     | <i>MATa his3Δ1 leu2Δ0 met15Δ0 ura3Δ0</i> |
| yYW0408     | Top-down <i>in vitro</i> SCRaMbLEd pLM495 yeast strain ( <i>crtE</i> deletion)                                                                      | <i>MATa his3Δ1 leu2Δ0 met15Δ0 ura3Δ0</i> |
| yYW0409     | Top-down <i>in vitro</i> SCRaMbLEd pLM495 yeast strain ( <i>crtI crtYB</i> and <i>tHMG1</i> deletion)                                               | <i>MATa his3Δ1 leu2Δ0 met15Δ0 ura3Δ0</i> |
| yYW0410     | Top-down <i>in vitro</i> SCRaMbLEd pLM495 yeast strain ( <i>crtI</i> and <i>crtYB</i> deletion)                                                     | <i>MATa his3Δ1 leu2Δ0 met15Δ0 ura3Δ0</i> |
| yYW0411     | Top-down <i>in vitro</i> SCRaMbLEd pLM495 yeast strain ( <i>crtE</i> and <i>crtI</i> deletion)                                                      | <i>MATa his3Δ1 leu2Δ0 met15Δ0 ura3Δ0</i> |

|         |                                                                                                                |                                                                                                                                            |
|---------|----------------------------------------------------------------------------------------------------------------|--------------------------------------------------------------------------------------------------------------------------------------------|
| yYW0301 | BY4741 with $\beta$ -carotene gene <i>crtYB</i> , <i>crtI</i> , <i>crtE</i> at <i>CAN1</i>                     | <i>MATa his3<math>\Delta</math>1 leu2<math>\Delta</math>0 met15<math>\Delta</math>0 ura3<math>\Delta</math>0 CAN1::crtI-crtYB-crtE-LEU</i> |
| yYW0339 | Bottom-up <i>in vitro</i> SCRaMbLE control                                                                     | <i>MATa his3<math>\Delta</math>1 leu2<math>\Delta</math>0 met15<math>\Delta</math>0 ura3<math>\Delta</math>0 CAN1::crtI-crtYB-crtE-LEU</i> |
| yYW0303 | Bottom-up <i>in vitro</i> SCRaMbLEd plasmid pYW0113 with <i>tHMG1</i> inserted                                 | <i>MATa his3<math>\Delta</math>1 leu2<math>\Delta</math>0 met15<math>\Delta</math>0 ura3<math>\Delta</math>0 CAN1::crtI-crtYB-crtE-LEU</i> |
| yYW0304 | Bottom-up <i>in vitro</i> SCRaMbLEd plasmid pYW0113 with <i>crtYB</i> inserted                                 | <i>MATa his3<math>\Delta</math>1 leu2<math>\Delta</math>0 met15<math>\Delta</math>0 ura3<math>\Delta</math>0 CAN1::crtI-crtYB-crtE-LEU</i> |
| yYW0305 | Bottom-up <i>in vitro</i> SCRaMbLEd plasmid pYW0113 with <i>crtE</i> inserted                                  | <i>MATa his3<math>\Delta</math>1 leu2<math>\Delta</math>0 met15<math>\Delta</math>0 ura3<math>\Delta</math>0 CAN1::crtI-crtYB-crtE-LEU</i> |
| yYW0306 | Bottom-up <i>in vitro</i> SCRaMbLEd plasmid pYW0113 with <i>crtI</i> inserted                                  | <i>MATa his3<math>\Delta</math>1 leu2<math>\Delta</math>0 met15<math>\Delta</math>0 ura3<math>\Delta</math>0 CAN1::crtI-crtYB-crtE-LEU</i> |
| yYW0308 | Bottom-up <i>in vitro</i> SCRaMbLEd plasmid pYW0113 with <i>ERG12</i> inserted                                 | <i>MATa his3<math>\Delta</math>1 leu2<math>\Delta</math>0 met15<math>\Delta</math>0 ura3<math>\Delta</math>0 CAN1::crtI-crtYB-crtE-LEU</i> |
| yYW0309 | Bottom-up <i>in vitro</i> SCRaMbLEd plasmid pYW0113 with <i>MVD1</i> inserted                                  | <i>MATa his3<math>\Delta</math>1 leu2<math>\Delta</math>0 met15<math>\Delta</math>0 ura3<math>\Delta</math>0 CAN1::crtI-crtYB-crtE-LEU</i> |
| yYW0310 | Bottom-up <i>in vitro</i> SCRaMbLEd plasmid pYW0113 with <i>ERG20</i> inserted                                 | <i>MATa his3<math>\Delta</math>1 leu2<math>\Delta</math>0 met15<math>\Delta</math>0 ura3<math>\Delta</math>0 CAN1::crtI-crtYB-crtE-LEU</i> |
| yYW0311 | Bottom-up <i>in vitro</i> SCRaMbLEd plasmid pYW0113 with <i>ERG10</i> inserted                                 | <i>MATa his3<math>\Delta</math>1 leu2<math>\Delta</math>0 met15<math>\Delta</math>0 ura3<math>\Delta</math>0 CAN1::crtI-crtYB-crtE-LEU</i> |
| yYW0312 | Bottom-up <i>in vitro</i> SCRaMbLEd plasmid pYW0113 with <i>ERG8</i> inserted                                  | <i>MATa his3<math>\Delta</math>1 leu2<math>\Delta</math>0 met15<math>\Delta</math>0 ura3<math>\Delta</math>0 CAN1::crtI-crtYB-crtE-LEU</i> |
| yYW0313 | Bottom-up <i>in vitro</i> SCRaMbLEd plasmid pYW0113 with <i>BTS1</i> inserted                                  | <i>MATa his3<math>\Delta</math>1 leu2<math>\Delta</math>0 met15<math>\Delta</math>0 ura3<math>\Delta</math>0 CAN1::crtI-crtYB-crtE-LEU</i> |
| yYW0316 | Bottom-up <i>in vitro</i> SCRaMbLEd plasmid pYW0113 with <i>crtI</i> , <i>ERG13</i> inserted                   | <i>MATa his3<math>\Delta</math>1 leu2<math>\Delta</math>0 met15<math>\Delta</math>0 ura3<math>\Delta</math>0 CAN1::crtI-crtYB-crtE-LEU</i> |
| yYW0317 | Bottom-up <i>in vitro</i> SCRaMbLEd plasmid pYW0113 with <i>crtI</i> , <i>ERG12</i> inserted                   | <i>MATa his3<math>\Delta</math>1 leu2<math>\Delta</math>0 met15<math>\Delta</math>0 ura3<math>\Delta</math>0 CAN1::crtI-crtYB-crtE-LEU</i> |
| yYW0319 | Bottom-up <i>in vitro</i> SCRaMbLEd plasmid pYW0113 with <i>crtYB</i> , <i>crtE</i> inserted                   | <i>MATa his3<math>\Delta</math>1 leu2<math>\Delta</math>0 met15<math>\Delta</math>0 ura3<math>\Delta</math>0 CAN1::crtI-crtYB-crtE-LEU</i> |
| yYW0320 | Bottom-up <i>in vitro</i> SCRaMbLEd plasmid pYW0113 with <i>crtYB</i> , <i>tHMG1</i> inserted                  | <i>MATa his3<math>\Delta</math>1 leu2<math>\Delta</math>0 met15<math>\Delta</math>0 ura3<math>\Delta</math>0 CAN1::crtI-crtYB-crtE-LEU</i> |
| yYW0321 | Bottom-up <i>in vitro</i> SCRaMbLEd plasmid pYW0113 with <i>crtI</i> , <i>BTS1</i> inserted                    | <i>MATa his3<math>\Delta</math>1 leu2<math>\Delta</math>0 met15<math>\Delta</math>0 ura3<math>\Delta</math>0 CAN1::crtI-crtYB-crtE-LEU</i> |
| yYW0322 | Bottom-up <i>in vitro</i> SCRaMbLEd plasmid pYW0113 with <i>crtE</i> , <i>crtI</i> , and <i>tHMG1</i> inserted | <i>MATa his3<math>\Delta</math>1 leu2<math>\Delta</math>0 met15<math>\Delta</math>0 ura3<math>\Delta</math>0 CAN1::crtI-crtYB-crtE-LEU</i> |
| yYW0338 | Bottom-up <i>in vitro</i> SCRaMbLEd plasmid pYW0113 with two <i>crtI</i> inserted                              | <i>MATa his3<math>\Delta</math>1 leu2<math>\Delta</math>0 met15<math>\Delta</math>0 ura3<math>\Delta</math>0 CAN1::crtI-crtYB-crtE-LEU</i> |
| yYW0412 | ARTP for yYW0257                                                                                               | <i>MATa his3<math>\Delta</math>1 leu2<math>\Delta</math>0 met15<math>\Delta</math>0 ura3<math>\Delta</math>0</i>                           |
| yYW0413 | ARTP for yYW0257                                                                                               | <i>MATa his3<math>\Delta</math>1 leu2<math>\Delta</math>0 met15<math>\Delta</math>0 ura3<math>\Delta</math>0</i>                           |
| yYW0414 | ARTP for yYW0257                                                                                               | <i>MATa his3<math>\Delta</math>1 leu2<math>\Delta</math>0 met15<math>\Delta</math>0</i>                                                    |

|         |                                                                                                                                                       |                                          |
|---------|-------------------------------------------------------------------------------------------------------------------------------------------------------|------------------------------------------|
|         |                                                                                                                                                       | <i>ura3Δ0</i>                            |
| yYW0415 | ARTP for yYW0257                                                                                                                                      | <i>MATa his3Δ1 leu2Δ0 met15Δ0 ura3Δ0</i> |
| yYW0416 | ARTP for yYW0257                                                                                                                                      | <i>MATa his3Δ1 leu2Δ0 met15Δ0 ura3Δ0</i> |
| yYW0417 | ARTP for yYW0257                                                                                                                                      | <i>MATa his3Δ1 leu2Δ0 met15Δ0 ura3Δ0</i> |
| yYW0418 | ARTP for yYW0257                                                                                                                                      | <i>MATa his3Δ1 leu2Δ0 met15Δ0 ura3Δ0</i> |
| yYW0419 | ARTP for yYW0257                                                                                                                                      | <i>MATa his3Δ1 leu2Δ0 met15Δ0 ura3Δ0</i> |
| yYW0420 | ARTP for yYW0257                                                                                                                                      | <i>MATa his3Δ1 leu2Δ0 met15Δ0 ura3Δ0</i> |
| yYW0421 | ARTP for yYW0257                                                                                                                                      | <i>MATa his3Δ1 leu2Δ0 met15Δ0 ura3Δ0</i> |
| yYW0422 | ARTP for yYW0257                                                                                                                                      | <i>MATa his3Δ1 leu2Δ0 met15Δ0 ura3Δ0</i> |
| yYW0423 | ARTP for yYW0257                                                                                                                                      | <i>MATa his3Δ1 leu2Δ0 met15Δ0 ura3Δ0</i> |
| yYW0424 | ARTP for yYW0257                                                                                                                                      | <i>MATa his3Δ1 leu2Δ0 met15Δ0 ura3Δ0</i> |
| yYW0425 | ARTP for yYW0257                                                                                                                                      | <i>MATa his3Δ1 leu2Δ0 met15Δ0 ura3Δ0</i> |
| yYW0426 | ARTP for yYW0257                                                                                                                                      | <i>MATa his3Δ1 leu2Δ0 met15Δ0 ura3Δ0</i> |
| yYW0427 | ARTP for yYW0257                                                                                                                                      | <i>MATa his3Δ1 leu2Δ0 met15Δ0 ura3Δ0</i> |
| yYW0428 | ARTP for yYW0257                                                                                                                                      | <i>MATa his3Δ1 leu2Δ0 met15Δ0 ura3Δ0</i> |
| yYW0429 | Random Mutation for pLM495 of gene <i>crtI</i> (S[AGC]339S[AGU], E[GAG]368E[GAA])                                                                     | <i>MATa his3Δ1 leu2Δ0 met15Δ0 ura3Δ0</i> |
| yYW0430 | Random Mutation for pLM495 of gene <i>crtI</i> (K[AAA]9I[AUA], C[UGU]182F[UUU])                                                                       | <i>MATa his3Δ1 leu2Δ0 met15Δ0 ura3Δ0</i> |
| yYW0431 | Random Mutation for pLM495 of gene <i>crtI</i> (L[CUC]66L[CUA], D[GAU]69D[UAU])                                                                       | <i>MATa his3Δ1 leu2Δ0 met15Δ0 ura3Δ0</i> |
| yYW0432 | Random Mutation for pLM495 of gene <i>crtI</i> (P[CCU]154S[UCU], A[GCC]265V[GUC], D[GAC]267D[GAU], S[UCC]295S[UCG], Q[CAA]309H[CAU], S[AGC]339C[GGC]) | <i>MATa his3Δ1 leu2Δ0 met15Δ0 ura3Δ0</i> |
| yYW0433 | Random Mutation for pLM495 of gene <i>crtI</i> (N[AAC]41N[AAU], G[GGC]155G[GGU], I[AUC]241I[AUU], A[GCC]373V[GUC])                                    | <i>MATa his3Δ1 leu2Δ0 met15Δ0 ura3Δ0</i> |
| yYW0434 | Random Mutation for pLM495 of gene <i>crtI</i> (K[AAG]243D[AAC], V[GUU]322I[AUU],                                                                     | <i>MATa his3Δ1 leu2Δ0 met15Δ0 ura3Δ0</i> |

|         |                                                                                                                                                               |                                                                        |
|---------|---------------------------------------------------------------------------------------------------------------------------------------------------------------|------------------------------------------------------------------------|
|         | G[GGU]323A[GCU], I[AUC]352I[AUU],<br>R[CGA]384R[CGU])                                                                                                         |                                                                        |
| yYW0435 | Random Mutation for pLM495 of gene <i>crtI</i><br>(L[UUG]354M[AUG])                                                                                           | <i>MATa his3Δ1 leu2Δ0 met15Δ0<br/>ura3Δ0</i>                           |
| yYW0436 | Random Mutation for pLM495 of gene <i>crtI</i><br>(I[AUC]19I[AUU], A[GCC]249A[GCU],<br>L[CUU]261L[CUC], S[AGC]339G[GGC],<br>V[GUG]344M[AUG], A[GCU]408S[UCU]) | <i>MATa his3Δ1 leu2Δ0 met15Δ0<br/>ura3Δ0</i>                           |
| yYW0437 | Random Mutation for pLM495 of gene <i>crtI</i><br>(I[AUC]19V[GUC], L[UUG]354I[CUG])                                                                           | <i>MATa his3Δ1 leu2Δ0 met15Δ0<br/>ura3Δ0</i>                           |
| yYW0438 | Random Mutation for pLM495 of gene <i>crtI</i><br>(E[GAA]122N[GAU])                                                                                           | <i>MATa his3Δ1 leu2Δ0 met15Δ0<br/>ura3Δ0</i>                           |
| yYW0439 | Random Mutation for pLM495 of gene <i>crtI</i><br>(I[AUC]19I[AUA], S[AGU]316U[ACU])                                                                           | <i>MATa his3Δ1 leu2Δ0 met15Δ0<br/>ura3Δ0</i>                           |
| yYW0440 | Random Mutation for pLM495 of gene <i>crtI</i><br>(V[GUC]425V[GUA], A[GCA]444U[ACA])                                                                          | <i>MATa his3Δ1 leu2Δ0 met15Δ0<br/>ura3Δ0</i>                           |
| yYW0441 | Random Mutation for pLM495 of gene <i>crtI</i><br>with no mutation                                                                                            | <i>MATa his3Δ1 leu2Δ0 met15Δ0<br/>ura3Δ0</i>                           |
| yYW0442 | Random Mutation for pLM495 of gene <i>crtI</i><br>with no mutation                                                                                            | <i>MATa his3Δ1 leu2Δ0 met15Δ0<br/>ura3Δ0</i>                           |
| yYW0443 | Random Mutation for pLM495 of gene <i>crtI</i><br>(M[AUG]82L[UUG],A[GCU]468A[GCA])                                                                            | <i>MATa his3Δ1 leu2Δ0 met15Δ0<br/>ura3Δ0</i>                           |
| yYW0444 | Random Mutation for pLM495 of gene <i>crtI</i><br>(Y[UAU]226Y[UAC])                                                                                           | <i>MATa his3Δ1 leu2Δ0 met15Δ0<br/>ura3Δ0</i>                           |
| yYW0462 | Bottom-up <i>in vitro</i> SCRaMbLED plasmid<br>with <i>crtE crtI crtYB tHMG1</i> inserted                                                                     | <i>MATa his3Δ1 leu2Δ0 met15Δ0<br/>ura3Δ0 CAN1::crtI-crtYB-crtE-LEU</i> |
| yYW0463 | Bottom-up <i>in vitro</i> SCRaMbLED plasmid<br>with <i>crtE crtI crtYB tHMG1</i> inserted                                                                     | <i>MATa his3Δ1 leu2Δ0 met15Δ0<br/>ura3Δ0 CAN2::crtI-crtYB-crtE-LEU</i> |
| yYW0464 | Bottom-up <i>in vitro</i> SCRaMbLED plasmid<br>with <i>crtE crtI crtYB tHMG1</i> inserted                                                                     | <i>MATa his3Δ1 leu2Δ0 met15Δ0<br/>ura3Δ0 CAN3::crtI-crtYB-crtE-LEU</i> |

**Supplementary Table 2. Plasmids used in this study.**

| Plasmid name | Description                                                                                                  |
|--------------|--------------------------------------------------------------------------------------------------------------|
| pLM495       | Top-down initial plasmid                                                                                     |
| pYW0108      | Top-down <i>in vitro</i> SCRaMbLEd pLM495, recovered from yYW0212                                            |
| pYW0109      | Top-down <i>in vitro</i> SCRaMbLEd pLM495, recovered from yYW0213                                            |
| pYW0110      | Top-down <i>in vitro</i> SCRaMbLEd pLM495, recovered from yYW0214                                            |
| pYW0113      | Acceptor vector                                                                                              |
| pYW0120      | Universal donor vector                                                                                       |
| pYW0122      | <i>crtI</i> in pYW0120                                                                                       |
| pYW0123      | <i>crtE</i> in pYW0120                                                                                       |
| pYW0124      | <i>crtYB</i> in pYW0120                                                                                      |
| pYW0125      | <i>tHMG1</i> in pYW0120                                                                                      |
| pYW0126      | <i>ERG10</i> in pYW0120                                                                                      |
| pYW0127      | <i>ERG12</i> in pYW0120                                                                                      |
| pYW0128      | <i>ERG8</i> in pYW0120                                                                                       |
| pYW0129      | <i>MVD1</i> in pYW0120                                                                                       |
| pYW0130      | <i>ERG20</i> in pYW0120                                                                                      |
| pYW0131      | <i>BTS1</i> in pYW0120                                                                                       |
| pYW0198      | <i>ERG13</i> in pYW0120                                                                                      |
| pYW0235      | Bottom-up initial plasmid                                                                                    |
| pYW0199      | Bottom-up <i>in vitro</i> SCRaMbLEd plasmid with <i>tHMG1</i> inserted, recovered from yYW0303               |
| pYW0200      | Bottom-up <i>in vitro</i> SCRaMbLEd plasmid with <i>crtYB</i> inserted, recovered from yYW0304               |
| pYW0201      | Bottom-up <i>in vitro</i> SCRaMbLEd plasmid with <i>crtE</i> inserted, recovered from yYW0305                |
| pYW0202      | Bottom-up <i>in vitro</i> SCRaMbLEd plasmid with <i>crtI</i> inserted, recovered from yYW0306                |
| pYW0204      | Bottom-up <i>in vitro</i> SCRaMbLEd plasmid with <i>ERG12</i> inserted, recovered from yYW0308               |
| pYW0205      | Bottom-up <i>in vitro</i> SCRaMbLEd plasmid with <i>MVD1</i> inserted, recovered from yYW0309                |
| pYW0206      | Bottom-up <i>in vitro</i> SCRaMbLEd plasmid with <i>ERG20</i> inserted, recovered from yYW0310               |
| pYW0207      | Bottom-up <i>in vitro</i> SCRaMbLEd plasmid with <i>ERG10</i> inserted, recovered from yYW0311               |
| pYW0208      | Bottom-up <i>in vitro</i> SCRaMbLEd plasmid with <i>ERG8</i> inserted, recovered from yYW0312                |
| pYW0209      | Bottom-up <i>in vitro</i> SCRaMbLEd plasmid with <i>BTS1</i> inserted, recovered from yYW0313                |
| pYW0212      | Bottom-up <i>in vitro</i> SCRaMbLEd plasmid with <i>crtI</i> , <i>ERG13</i> inserted, recovered from yYW0316 |

|         |                                                                                                                              |
|---------|------------------------------------------------------------------------------------------------------------------------------|
| pYW0213 | Bottom-up <i>in vitro</i> SCRaMbLEd plasmid with <i>crtI</i> , <i>ERG12</i> inserted, recovered from yYW0317                 |
| pYW0215 | Bottom-up <i>in vitro</i> SCRaMbLEd plasmid with <i>crtYB</i> , <i>crtE</i> inserted, recovered from yYW0319                 |
| pYW0216 | Bottom-up <i>in vitro</i> SCRaMbLEd plasmid with <i>crtYB</i> , <i>tHMG1</i> inserted, recovered from yYW0320                |
| pYW0217 | Bottom-up <i>in vitro</i> SCRaMbLEd plasmid with <i>crtI</i> , <i>BTS1</i> inserted, recovered from yYW0321                  |
| pYW0218 | Bottom-up <i>in vitro</i> SCRaMbLEd plasmid with <i>crtE</i> , <i>crtI</i> and <i>tHMG1</i> inserted, recovered from yYW0322 |
| pYW0230 | Bottom-up <i>in vitro</i> SCRaMbLEd plasmid with two <i>crtI</i> inserted, recovered from yYW0338                            |
| pYW0259 | 36bp redesigned loxPsym* inserted after start codon of <i>URA3</i>                                                           |
| pYW0260 | pEASY vector encoding 10 loxPsym sites with 100bp between adjacent loxPsym sites                                             |
| pYW0261 | pEASY vector encoding 10 loxPsym sites with 500bp between adjacent loxPsym sites                                             |
| pYW0262 | pEASY vector encoding 10 loxPsym sites with 1000bp between adjacent loxPsym sites                                            |
| pYW0263 | Recovered plasmid from yYW0263                                                                                               |
| pYW0264 | Recovered plasmid from yYW0264                                                                                               |
| pYW0265 | Recovered plasmid from yYW0265                                                                                               |
| pYW0268 | Top-down <i>in vitro</i> SCRaMbLEd pLM495, recovered from yYW0396                                                            |
| pYW0270 | Top-down <i>in vitro</i> SCRaMbLEd pLM495, recovered from yYW0398                                                            |
| pYW0271 | Top-down <i>in vitro</i> SCRaMbLEd pLM495, recovered from yYW0399                                                            |
| pYW0272 | Top-down <i>in vitro</i> SCRaMbLEd pLM495, recovered from yYW0400                                                            |
| pYW0273 | Top-down <i>in vitro</i> SCRaMbLEd pLM495, recovered from yYW0401                                                            |
| pYW0275 | Top-down <i>in vitro</i> SCRaMbLEd pLM495, recovered from yYW0403                                                            |
| pYW0276 | Top-down <i>in vitro</i> SCRaMbLEd pLM495, recovered from yYW0404                                                            |
| pYW0277 | Top-down <i>in vitro</i> SCRaMbLEd pLM495, recovered from yYW0405                                                            |
| pYW0278 | Top-down <i>in vitro</i> SCRaMbLEd pLM495, recovered from yYW0406                                                            |
| pYW0279 | Top-down <i>in vitro</i> SCRaMbLEd pLM495, recovered from yYW0407                                                            |
| pYW0280 | Top-down <i>in vitro</i> SCRaMbLEd pLM495, recovered from yYW0408                                                            |
| pYW0281 | Top-down <i>in vitro</i> SCRaMbLEd pLM495, recovered from yYW0409                                                            |
| pYW0282 | Top-down <i>in vitro</i> SCRaMbLEd pLM495, recovered from yYW0410                                                            |
| pYW0283 | Top-down <i>in vitro</i> SCRaMbLEd pLM495, recovered from yYW0411                                                            |
| pYW0292 | redesigned pLM495 with <i>SaII</i> inserted between two loxPsym sites                                                        |
